# Supplementary material for: New ecdysone receptor agonists: a computational approach for rational discovery of insecticides for crop protection
Source: Royal Society of Chemistry journal article supplement (doi:10.1039/d1me00047k), 2021-01-01
Supplement: d1me00047k1.pdf [file d1me00047k1.pdf]

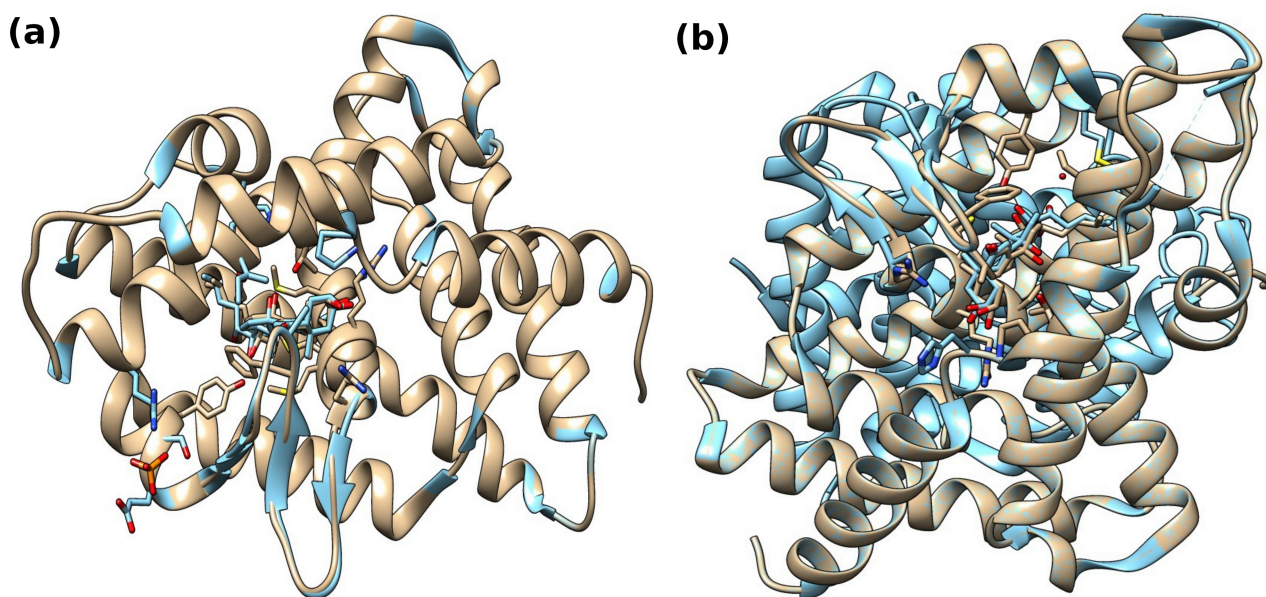

**Figure S1.** Superimposed protein 3-dimensional X-ray crystal structures (a) Hemiptera (b) Coleoptera. Color for experimental (blue) and docked (brown).

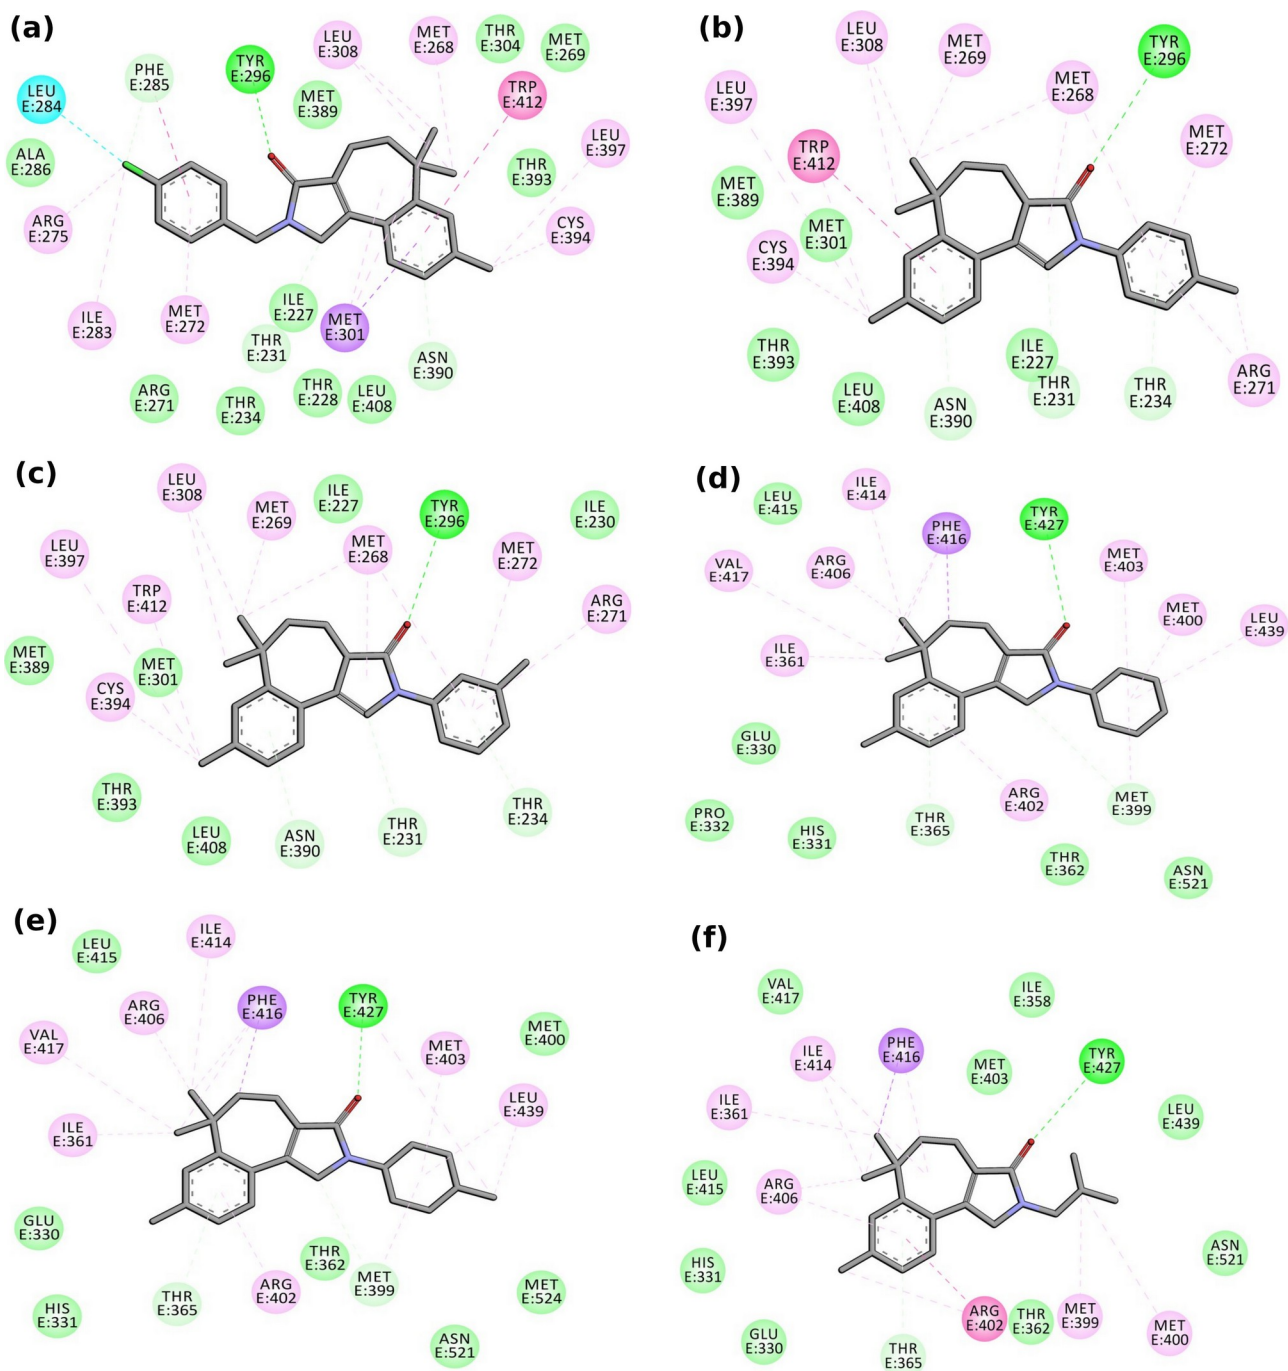

**Figure S2.** 2D interactions of more relevant compounds from docking for Hemiptera (a) Com-5, (b) Com-8, and (c) Com-9. For Coleoptera (d) Com-10, (e) Com-11, and (f) Com-15.

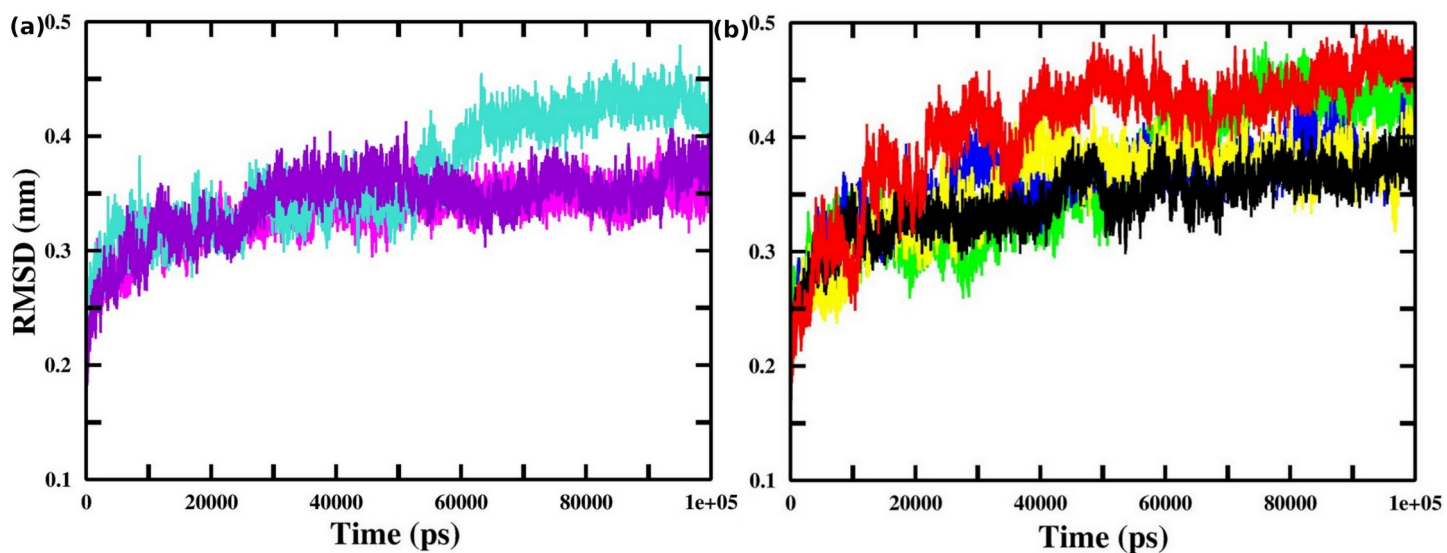

**Figure S3.** Backbone RMSDs are shown as a function of time at 300 K for (a) Hemiptera complex, ponasterone A (magenta), RH-5849 (violet), and Com-7 (turquoise). (b) Coleoptera complex, ponasterone A (black), RH-5849 (red), Com-3 (green), Com-8 (blue), and Com-12 (yellow).

**Table S1:** LE, Estimated Affinity, and Torsion values for Hemiptera.

| <b>Molecules</b> | <b>LE</b>                                                                           | <b>Estimated Affinity (Ki)</b> | <b>Torsion</b>                                                                        |
|------------------|-------------------------------------------------------------------------------------|--------------------------------|---------------------------------------------------------------------------------------|
| Com-1            |    | 5.15 $\mu$ M-52 nM             |    |
| Com-2            |    | 394.5 $\mu$ M-3971 nM          |    |
| Com-3            |    | 27.35 $\mu$ M-275 nM           |    |
| Com-4            |    | 4.06 $\mu$ M-41 nM             |    |
| Com-5            |    | 0.38 $\mu$ M-4 nM              |    |
| Com-6            |    | 10.96 $\mu$ M-110 nM           |    |
| Com-7            |    | 0.84 $\mu$ M-9 nM              |    |
| Com-8            |    | 0.703 $\mu$ M-7 nM             |    |
| Com-9            |  | 1.166 $\mu$ M-12 nM            |  |
| Com-10           |  | 123.11 $\mu$ M-1239 nM         |  |
| Com-11           |  | 9.65 $\mu$ M-97 nM             |  |
| Com-12           |  | 1.67 $\mu$ M-17 nM             |  |
| Com-13           |  | 26.94 $\mu$ M-271 nM           |  |
| Com-14           |  | 21.09 $\mu$ M-212 nM           |  |
| Com-15           |  | 9.96 $\mu$ M-100 nM            |  |
| Com-16           |  | 24.50 $\mu$ M-247 nM           |  |
| Com-17           |  | 6.53 $\mu$ M-66 nM             |  |
| Ponasterone A    |  | 0.164 nM                       |  |
| RH-5849          |  | 33.73 $\mu$ M-340 nM           |  |

**Table S2:** LE, Estimated Affinity, and Torsion values for Coleoptera.

| <b>Molecules</b> | <b>LE</b>                                                                           | <b>Estimated Affinity (Ki)</b> | <b>Torsion</b>                                                                        |
|------------------|-------------------------------------------------------------------------------------|--------------------------------|---------------------------------------------------------------------------------------|
| Com-1            |    | 542 nM-5 nM                    |    |
| Com-2            |    | 1115.88 $\mu$ M-112.31 $\mu$ M |    |
| Com-3            |    | 0.153 $\mu$ M-2 nM             |    |
| Com-4            |    | 169 nM-2 nM                    |    |
| Com-5            |    | 622 nM-6 nM                    |    |
| Com-6            |    | 1619 nM-16 nM                  |    |
| Com-7            |    | 5248 nM-53 nM                  |    |
| Com-8            |    | 0.199 $\mu$ M-2 nM             |    |
| Com-9            |  | 19.75 $\mu$ M-199 nM           |  |
| Com-10           |  | 835 nM-8 nM                    |  |
| Com-11           |  | 293 nM-3 nM                    |  |
| Com-12           |  | 58 nM-1 nM                     |  |
| Com-13           |  | 2156 nM-22 nM                  |  |
| Com-14           |  | 20.29 $\mu$ M-204 nM           |  |
| Com-15           |  | 3047 nM-31 nM                  |  |
| Com-16           |  | 311 nM-3 nM                    |  |
| Com-17           |  | 2228 nM-22 nM                  |  |
| Ponasterone A    |  | 0.277 nM                       |  |
| RH-5849          |  | 35.58 $\mu$ M-356 nM           |  |

**Table S3.** Lennard-Jones (LJ) and Coulombic potential energies within R-coulomb (Coul) during MD simulations.

| <b>Energy</b>                  | <b>Average</b> | <b>Error</b> | <b>Total (kJ/mol)</b> |
|--------------------------------|----------------|--------------|-----------------------|
| <b>Hemiptera-Com-7</b>         |                |              |                       |
| Coul-SR: Protein               | -1.11834e+06   | 7.4          | -9.59509              |
| LJ-SR: Protein                 | 145625         | 13           | -72.1567              |
| Coul-14:Protein                | 25707.4        | 7.1          | -18.2572              |
| LJ-14:Protein                  | 861.694        | 16           | -107.53               |
| Coul-SR: Ligand                | 0              | 0            | 0                     |
| LJ-SR: Ligand                  | 0              | 0            | 0                     |
| Coul-14: Ligand                | 0              | 0            | 0                     |
| LJ-14: Ligand                  | 199.28         | 0.48         | -2.5251               |
| <b>Total Energy</b>            | <b>-784787</b> | <b>31</b>    | <b>-203.227</b>       |
| <b>Hemiptera-ponasterone A</b> |                |              |                       |
| Coul-SR: Protein               | -1.12282e+06   | 240          | -1329.26              |
| LJ-SR: Protein                 | 145530         | 5.6          | -34.1932              |
| Coul-14:Protein                | 25759          | 9.7          | -2.32396              |
| LJ-14:Protein                  | 861.538        | 5.7          | -41.1836              |
| Coul-SR: Ligand                | 0              | 0            | 0                     |
| LJ-SR: Ligand                  | 0              | 0            | 0                     |
| Coul-14: Ligand                | 415.711        | 1.2          | -2.53222              |
| LJ-14: Ligand                  | 152.862        | 1.4          | -9.52315              |
| <b>Total Energy</b>            | <b>-784489</b> | <b>7.7</b>   | <b>-45.1127</b>       |
| <b>Hemiptera-RH-5849</b>       |                |              |                       |
| Coul-SR: Protein               | -1.12086e+06   | 120          | 692.856               |
| LJ-SR: Protein                 | 145586         | 8.8          | -45.4901              |
| Coul-14:Protein                | 25677.1        | 15           | -36.266               |
| LJ-14:Protein                  | 855.08         | 12           | -82.6284              |
| Coul-SR: Ligand                | 0              | 0            | 0                     |
| LJ-SR: Ligand                  | 0              | 0            | 0                     |
| Coul-14: Ligand                | 113.874        | 2.8          | -16.5788              |
| LJ-14: Ligand                  | 155.215        | 0.54         | 3.40295               |
| <b>Total Energy</b>            | <b>-784754</b> | <b>18</b>    | <b>-105.501</b>       |
| <b>Coleoptera-Com-3</b>        |                |              |                       |
| Coul-SR: Protein               | -910287        | 200          | -1123.68              |
| LJ-SR: Protein                 | 114457         | 9.7          | -68.83                |
| Coul-14:Protein                | 25019.3        | 22           | 142.68                |
| LJ-14:Protein                  | 866.04         | 13           | -88.36                |
| Coul-SR: Ligand                | 0              | 0            | 0                     |
| LJ-SR: Ligand                  | 0              | 0            | 0                     |
| Coul-14:Ligand                 | 0              | 0            | 0                     |
| LJ-14: Ligand                  | 177.89         | 0.37         | 0.99                  |
| <b>Total Energy</b>            | <b>-634613</b> | <b>14</b>    | <b>-89.3596</b>       |

| <b>Coleoptera-Com-8</b>         |                |           |                 |
|---------------------------------|----------------|-----------|-----------------|
| Coul-SR: Protein                | -907169        | 36        | -242.71         |
| LJ-SR: Protein                  | 114528         | 8.5       | -11.07          |
| Coul-14: Protein                | 24965.1        | 9.6       | -34.65          |
| LJ-14:Protein                   | 862.26         | 1.4       | -0.28           |
| Coul-SR: Ligand                 | 0              | 0         | 0               |
| LJ-SR: Ligand                   | 0              | 0         | 0               |
| Coul-14:Ligand                  | 0              | 0         | 0               |
| LJ-14: Ligand                   | 192.88         | 0.68      | -1.99           |
| <b>Total Energy</b>             | <b>-634829</b> | <b>26</b> | <b>-161.377</b> |
| <b>Coleoptera-Com-12</b>        |                |           |                 |
| Coul-SR: Protein                | -906560        | 10        | 39.53           |
| LJ-SR: Protein                  | 114488         | 7.4       | -53.81          |
| Coul-14:Protein                 | 24990.9        | 8.9       | -48.72          |
| LJ-14:Protein                   | 839.89         | 13        | -72.47          |
| Coul-SR: Ligand                 | 0              | 0         | 0               |
| LJ-SR: Ligand                   | 0              | 0         | 0               |
| Coul-14:Ligand                  | 0              | 0         | 0               |
| LJ-14: Ligand                   | 139.67         | 1.8       | 11.65           |
| <b>Total Energy</b>             | <b>-634811</b> | <b>23</b> | <b>-98.1885</b> |
| <b>Coleoptera-ponasterone A</b> |                |           |                 |
| Coul-SR: Protein                | -909110        | 100       | -510.13         |
| LJ-SR: Protein                  | 114539         | 13        | -92.6           |
| Coul-14:Protein                 | 25046.9        | 7         | -4.1            |
| LJ-14:Protein                   | 854.66         | 3.7       | -1.94           |
| Coul-SR: Ligand                 | 0              | 0         | 0               |
| LJ-SR: Ligand                   | 0              | 0         | 0               |
| Coul-14:Ligand                  | 406.25         | 1.2       | -6.74           |
| LJ-14: Ligand                   | 155.3          | 0.87      | -5.17           |
| <b>Total Energy</b>             | <b>-634844</b> | <b>14</b> | <b>-6.22158</b> |
| <b>Coleoptera-RH-5849</b>       |                |           |                 |
| Coul-SR: Protein                | -909748        | 23        | -140.06         |
| LJ-SR: Protein                  | 114503         | 7.8       | -33.69          |
| Coul-14:Protein                 | 24985.7        | 14        | 2.9             |
| LJ-14:Protein                   | 860.73         | 4.6       | -32.57          |
| Coul-SR: Ligand                 | 0              | 0         | 0               |
| LJ-SR: Ligand                   | 0              | 0         | 0               |
| Coul-14:Ligand                  | 120.01         | 1.4       | 6.45            |
| LJ-14: Ligand                   | 152.16         | 1.1       | -5.54           |
| <b>Total Energy</b>             | <b>-634686</b> | <b>29</b> | <b>-194.186</b> |
